# Supplementary material
Source: Springer Nature journal article supplement (https://www.springermedizin.de/resource/supplementary/13098_2014_388_MOESM2_ESM.docx/9670962)
Supplement: MOESM2 [file 9670962]

Table 2

Pearson correlation coefficients between irisin and metabolic parameters

|  | *r* | *P* value |
| --- | --- | --- |
| Age (years) | -0.073 | 0.434 |
| Waist (cm) | 0.064 | 0.491 |
| Hip (cm) | 0.165 | 0.071 |
| WHR | -0.043 | 0.64 |
| BMI (kg/m2)  Systolic BP (mmHg) | 0.08  0.016 | 0.383  0.864 |
| Diastolic BP (mmHg) | -0.079 | 0.389 |
| TC (mM) | 0.088 | 0.338 |
| TG (mM) | 0.144 | 0.115 |
| HDL-C (mM) | 0.075 | 0.409 |
| LDL-C (mM) | 0.071 | 0.439 |
| FFA (mM) | 0.06 | 0.52 |
| FPG (mM) | 0.165 | 0.069 |
| 2h PG (mM) | 0.077 | 0.399 |
| **HbA1C (%)** | **0.202** | **0.026** |
| Insulin (mU) | 0.166 | 0.069 |
| HOMA-β | 0.161 | 0.079 |
| HOMA-IR | 0.178 | 0.052 |
| ALT (IU/L) | 0.001 | 0.991 |
| AST (IU/L) | -0.063 | 0.489 |
| Urea (mM) | -0.127 | 0.165 |
| Creatinine (μM) | -0.126 | 0.166 |
| Uric acid (μM) | 0.047 | 0.609 |
| **eGFR (ml/min/1.73 m2)** | **0.239** | **0.01** |
| Muscle mass (kg) | 0.019 | 0.841 |
| Fat mass (kg) | 0.018 | 0.85 |
| Percentage of body fat (%) | 0.01 | 0.914 |

# WHR: waist-to-hip ratio; BMI: body mass index; BP: blood pressure; TC: total cholesterol; TG: triglycerides; HDL-C: high-density lipoprotein cholesterol; LDL-C: low-density lipoprotein cholesterol; FFA: free fatty acids; FPG: fasting plasma glucose; 2h PG: 2h plasma glucose; HbA1C: haemoglobin A1C; HOMA-β: homeostasis model assessment-β; HOMA-IR: homeostasis model assessment of insulin resistance; ALT: alanine transaminase; AST: aspartate transaminase; eGFR: estimated glomerular filtration rate.
